# Supplementary material for: LC–MS/MS Phytochemical Profiling, Antioxidant Activity, and Cytotoxicity of the Ethanolic Extract of Atriplex halimus L. against Breast Cancer Cell Lines: Computational Studies and Experimental Validation
Source: MDPI journal article supplement (doi:10.3390/ph15091156), 2022-09-16

# = Shimadzu LabSolutions Quant. Browser Data Report =

Acquired by : System Administrator  
 Data Acquired : 09/02/2022 10:25:14  
 Sample Type : Unknown  
 Sample Name : blnk  
 Sample ID :  
 Sample Amount : 1  
 Dilution Factor : 1  
 Vial# : 100  
 Injection Volume : 10 uL  
 Data Filename : blnk\_001.lcd  
 Method Filename : polifenoli screening SIM C18.lcm  
 Processed by : System Administrator  
 Modified Date : 09/02/2022 10:30:16

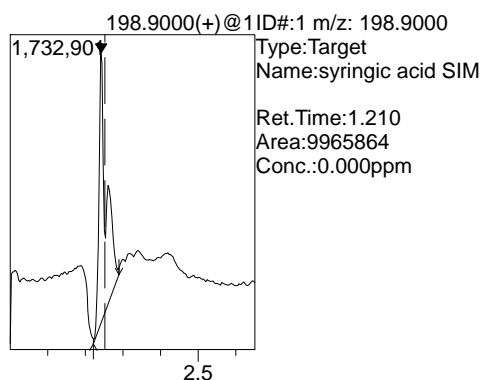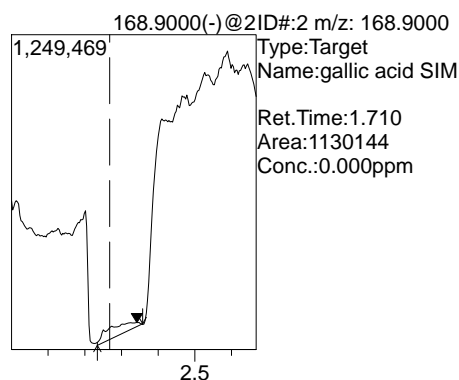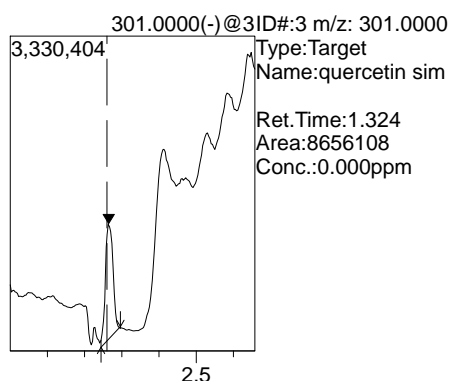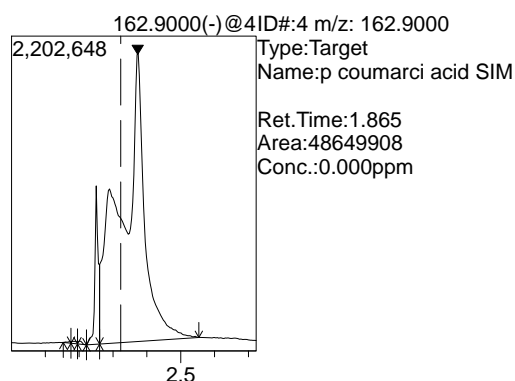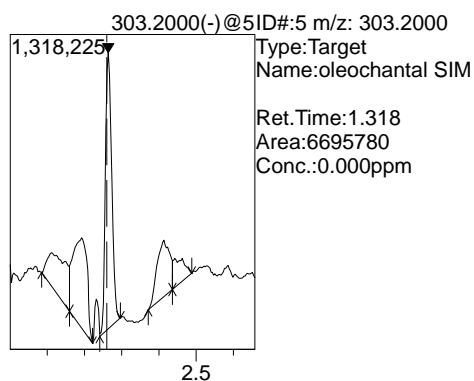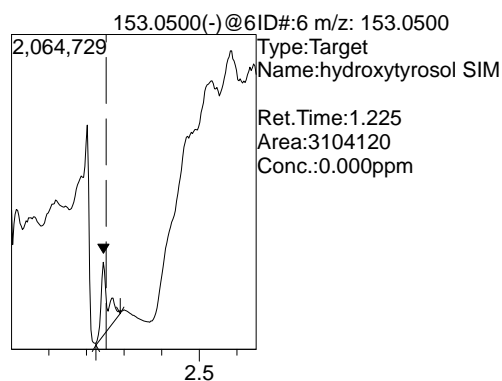

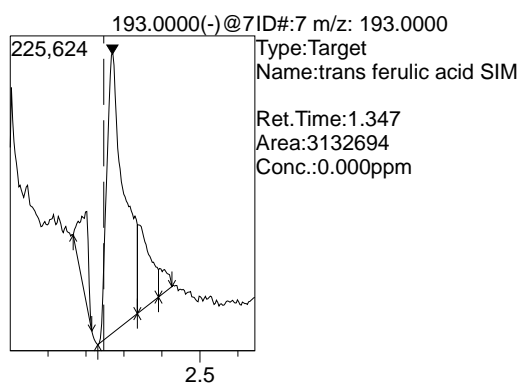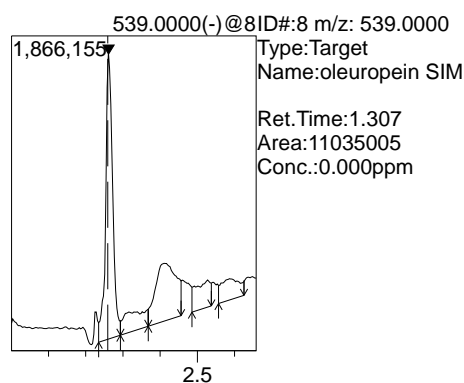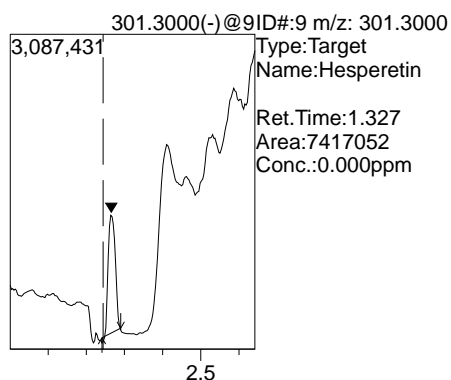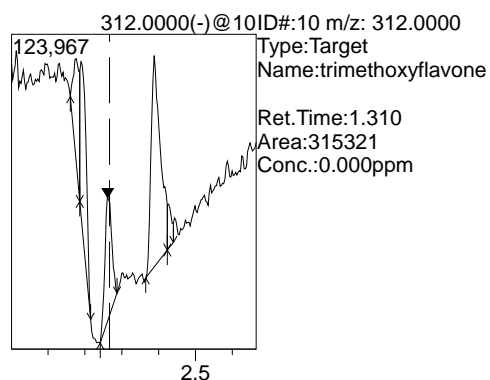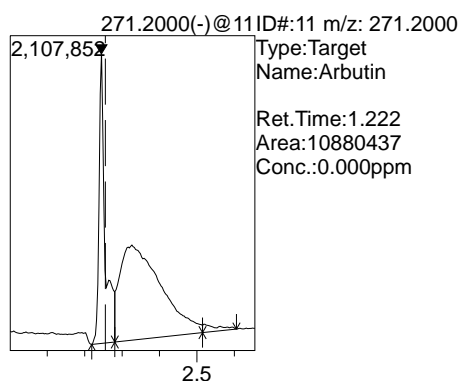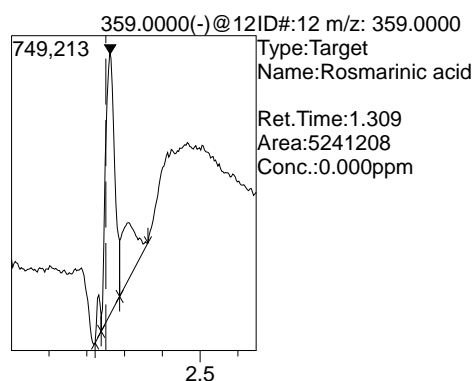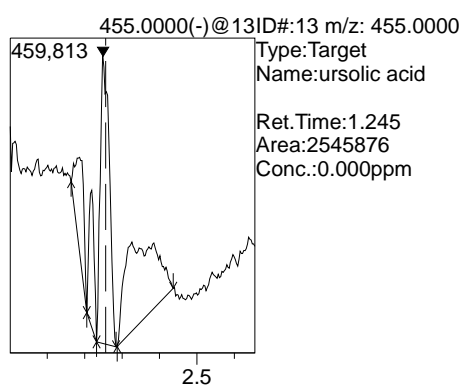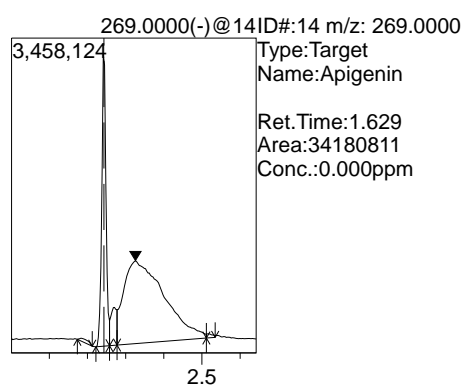

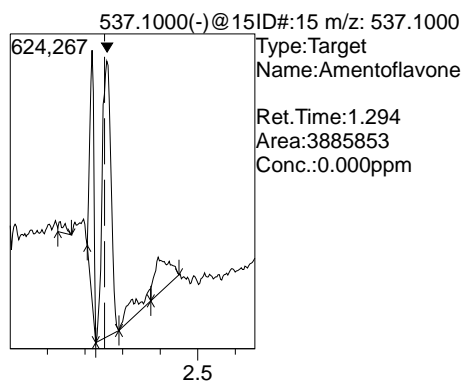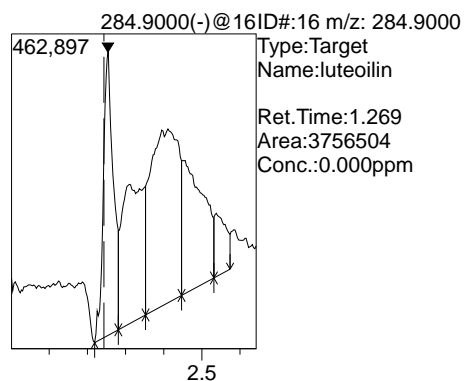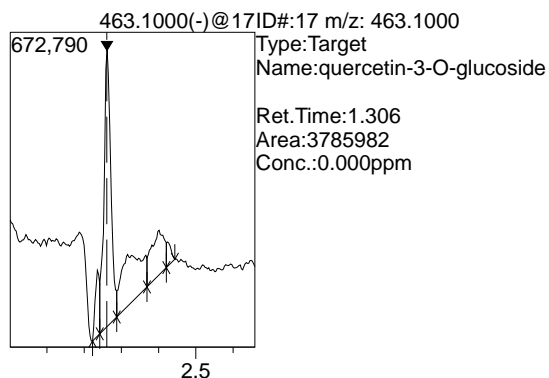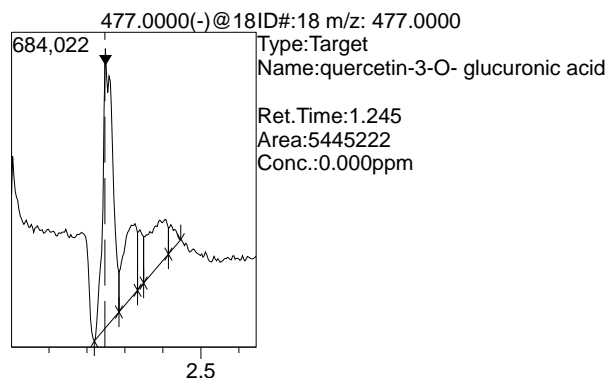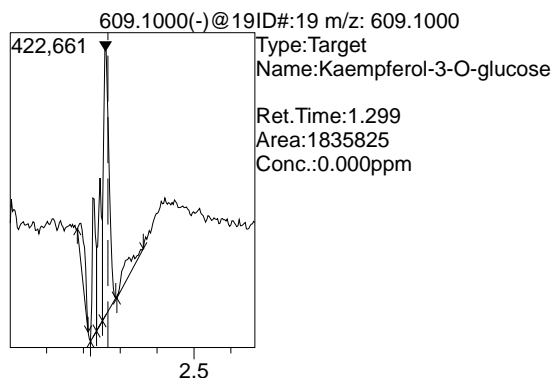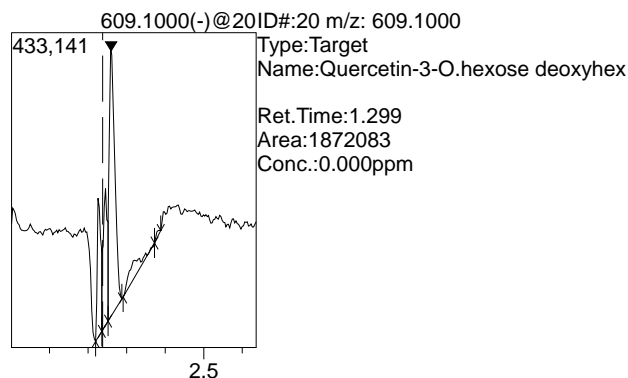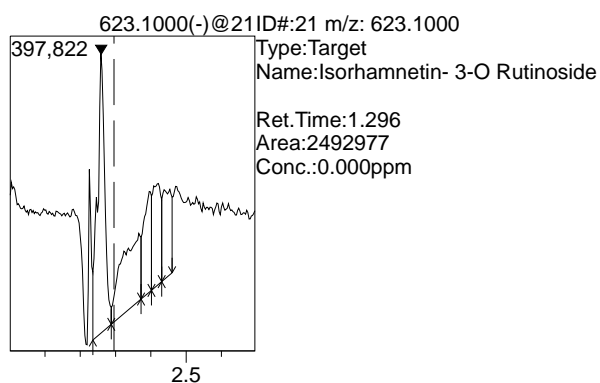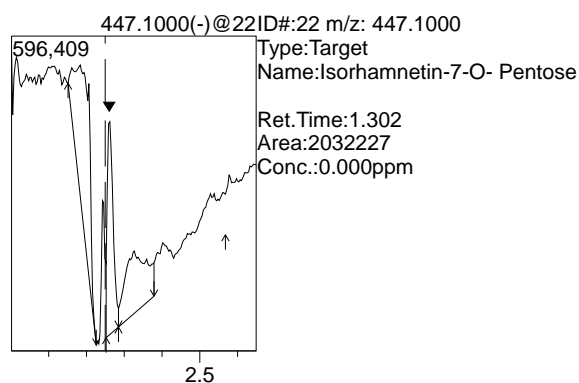

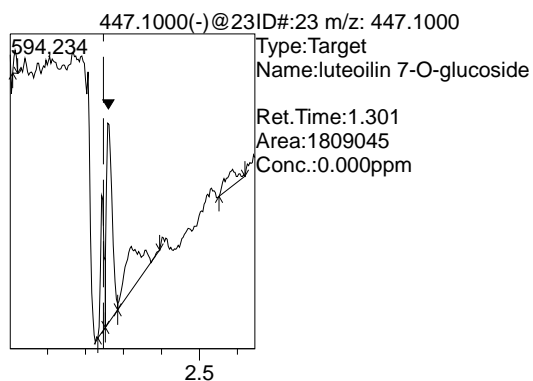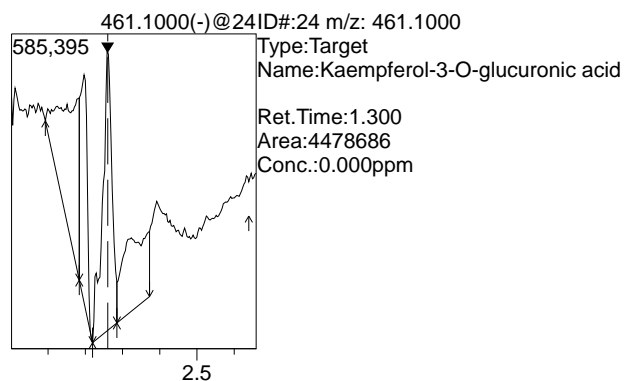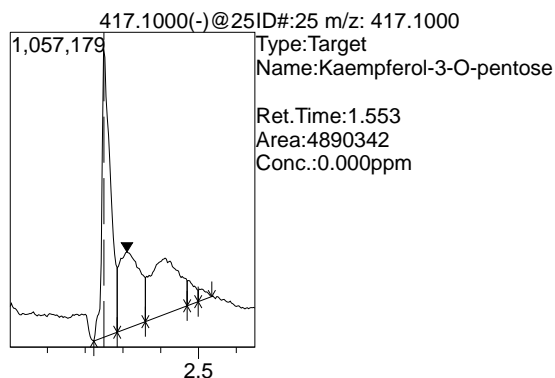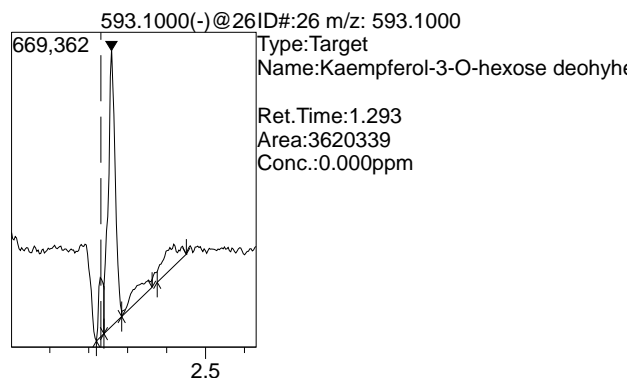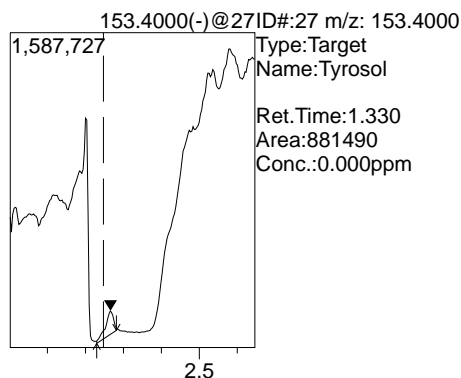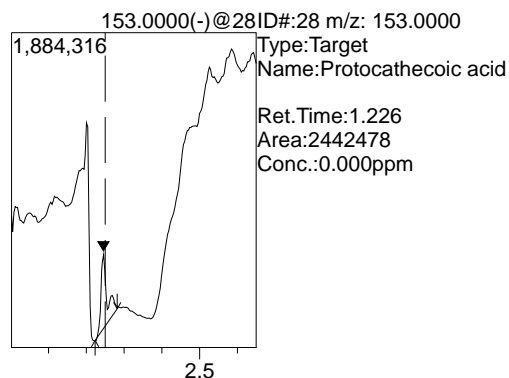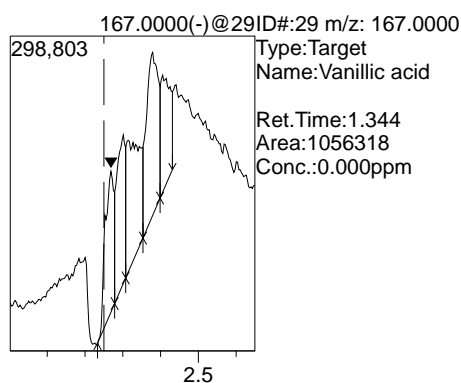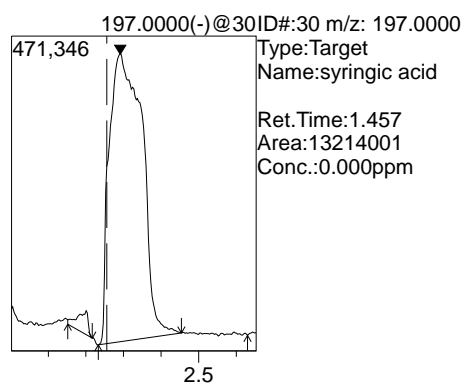

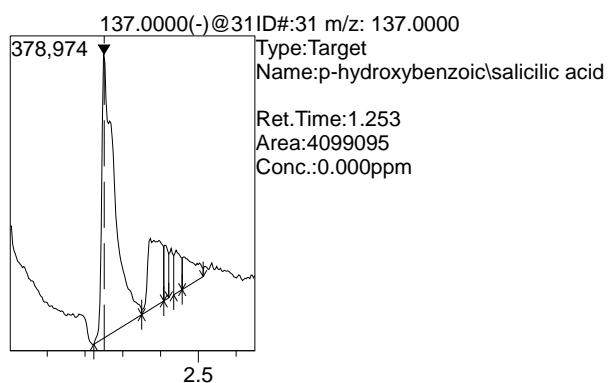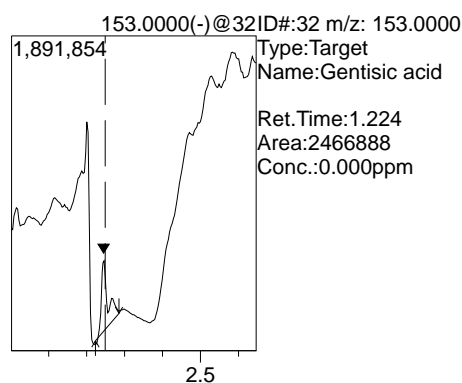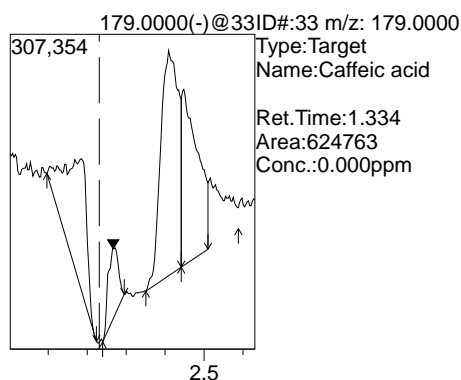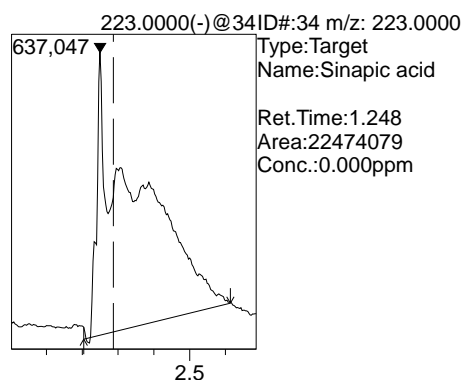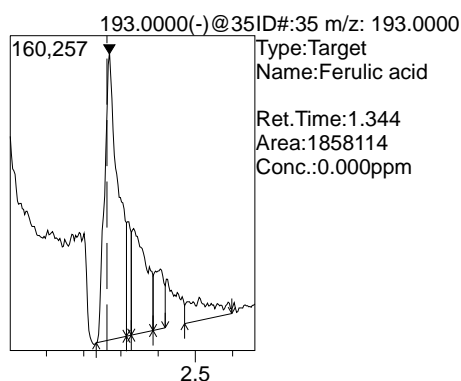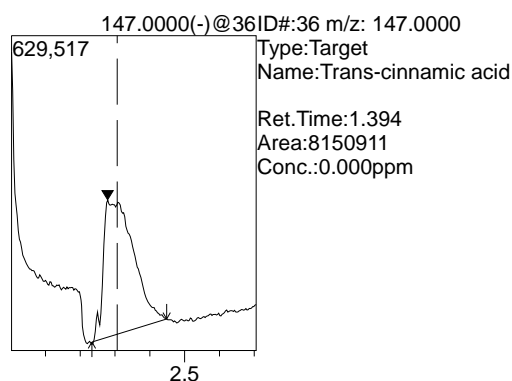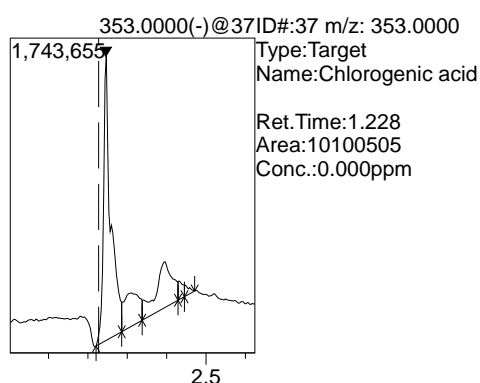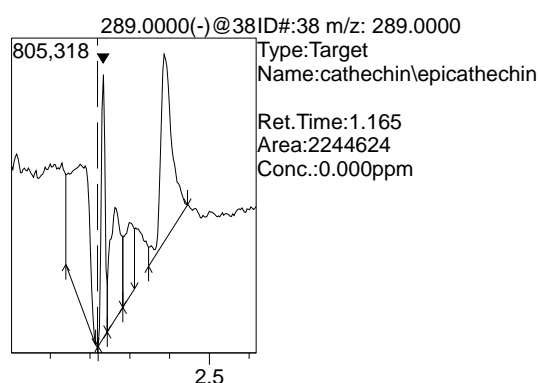

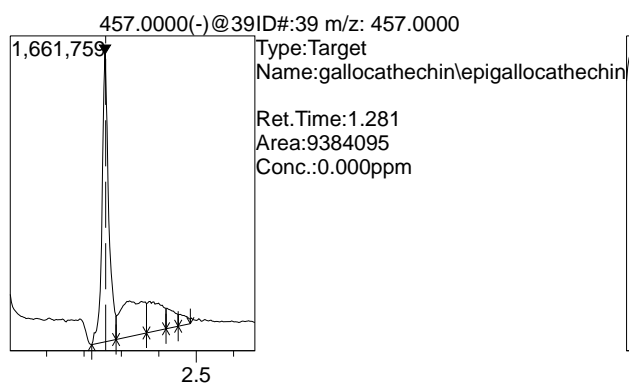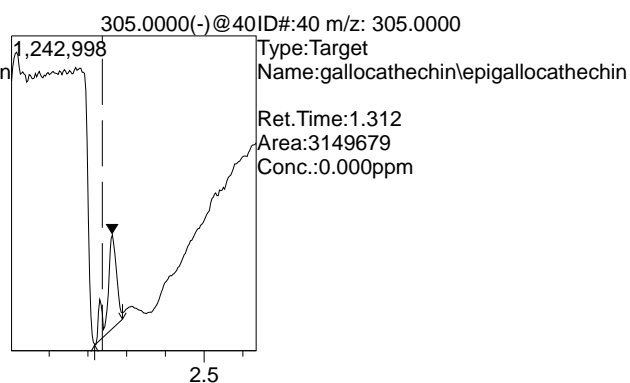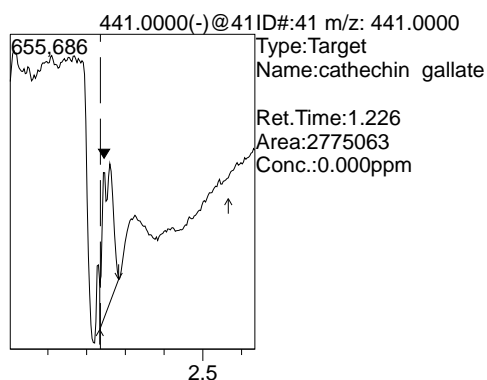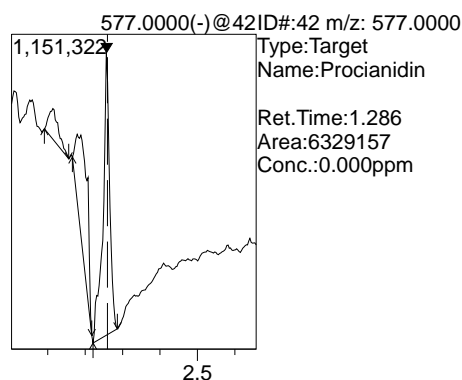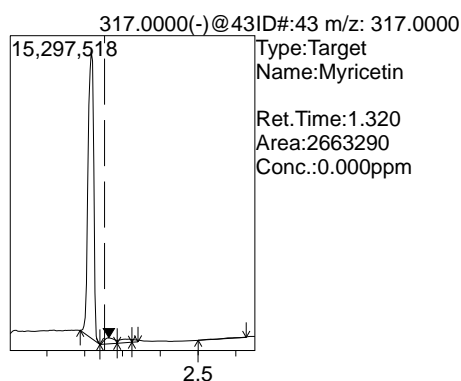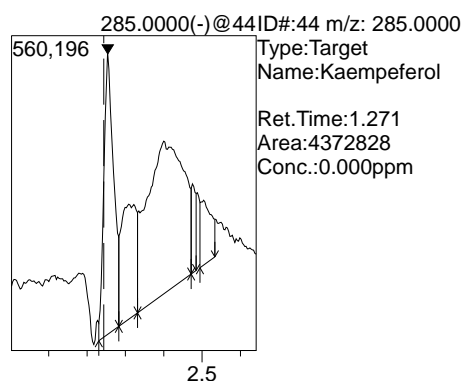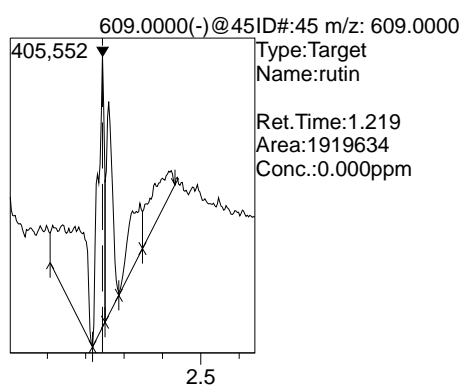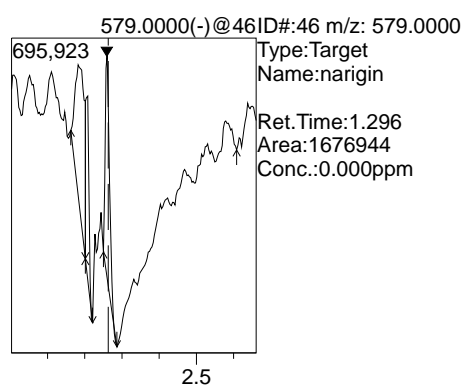

Supplement: s1 [file s1]
