# Supplementary material for: LC–MS/MS Phytochemical Profiling, Antioxidant Activity, and Cytotoxicity of the Ethanolic Extract of Atriplex halimus L. against Breast Cancer Cell Lines: Computational Studies and Experimental Validation
Source: MDPI journal article supplement (doi:10.3390/ph15091156), 2022-09-16
Supplement: s1 [file s1]

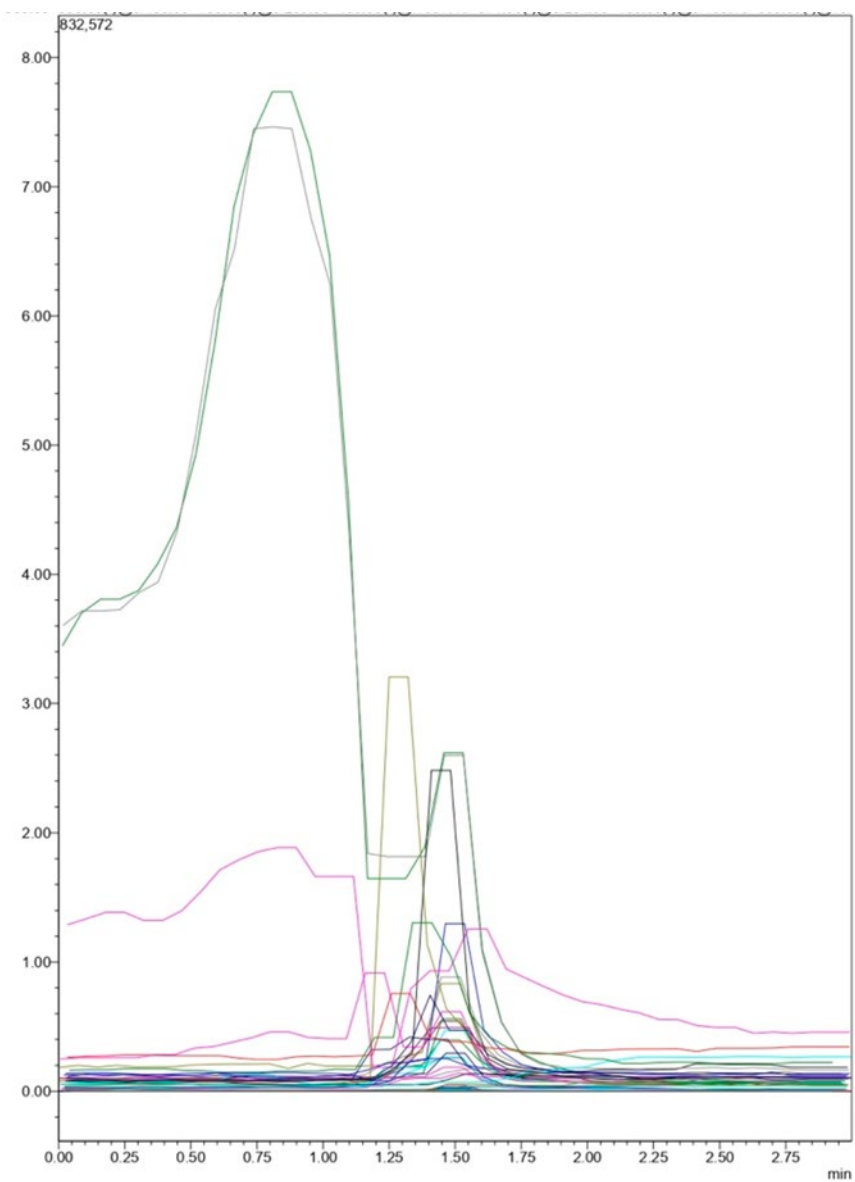

**Figure S1.** Selected fragments derive from the molecular weight of the polyphenol minus one (due to ESI- ionization) and their subsequent fragmentation in MS/MS experiment.

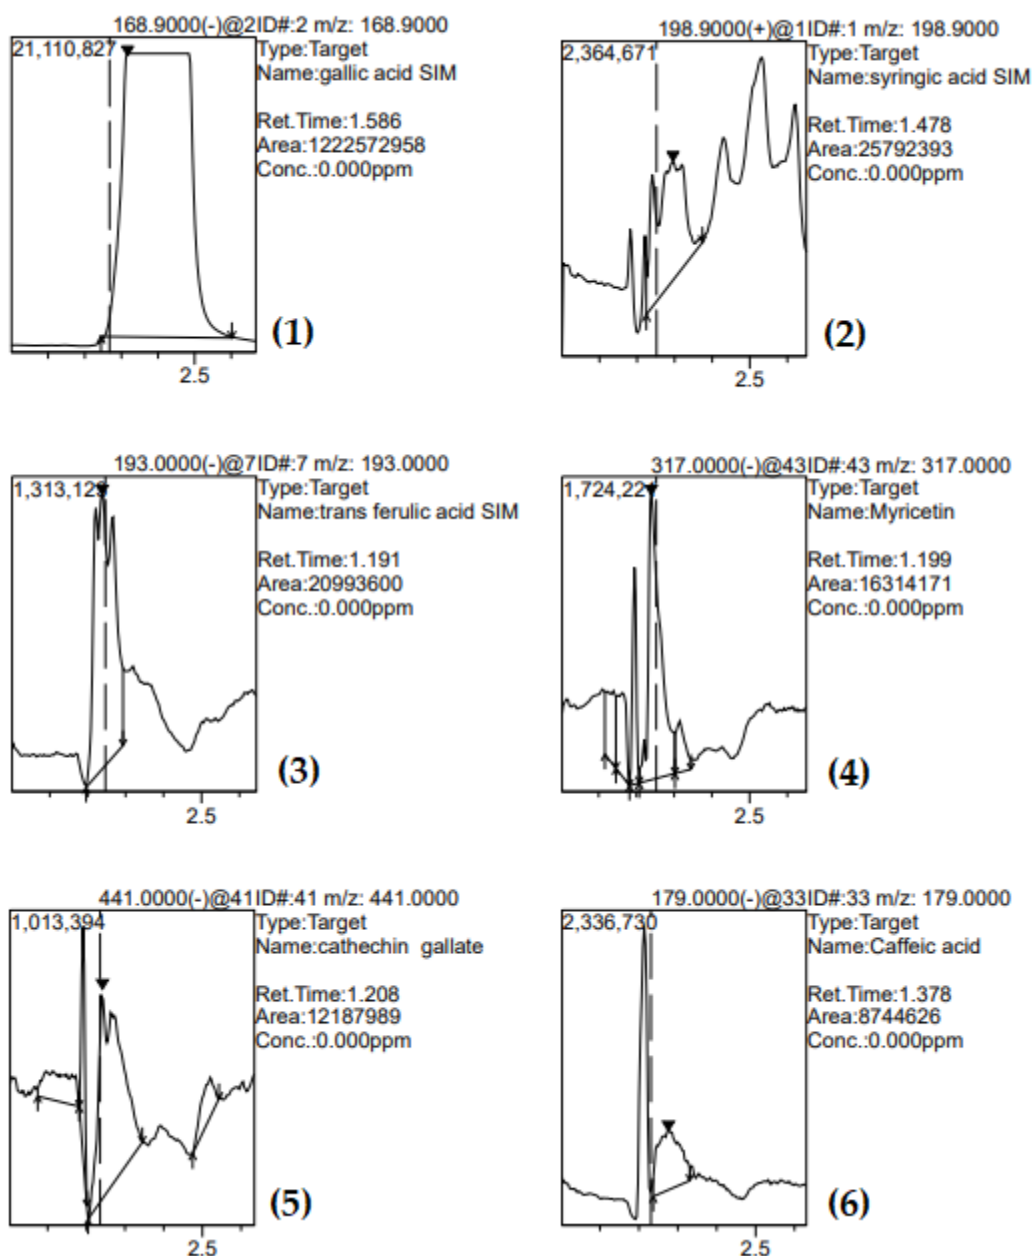

**Figure S2.** Screening of polyphenols from *A. halimus* ethanolic extract (AHEE) using LC-MS/MS. (1) Gallic acid, (2) Syringic acid, (3) *trans*-Ferulic acid, (4) Myricetin, (5) Catechin gallate, (6) Caffeic acid, (7) Chlorogenic acid, (8) Arbutin, (9) Trimethoxyflavone.

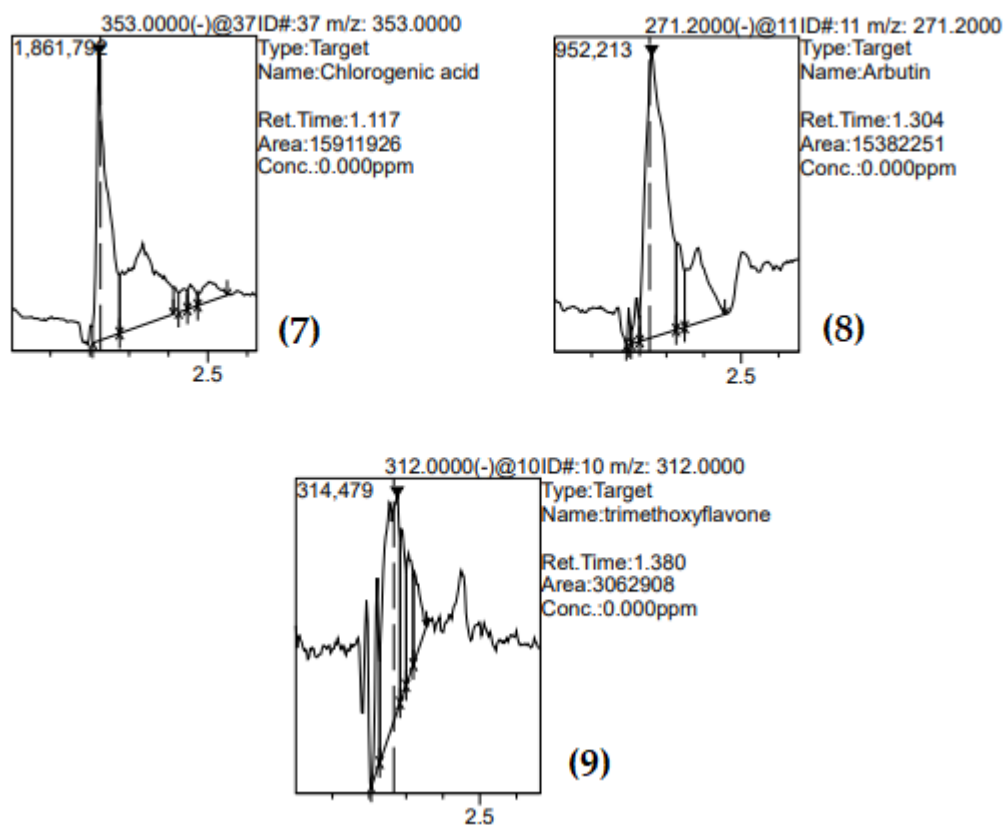

Figure S2. Cont.

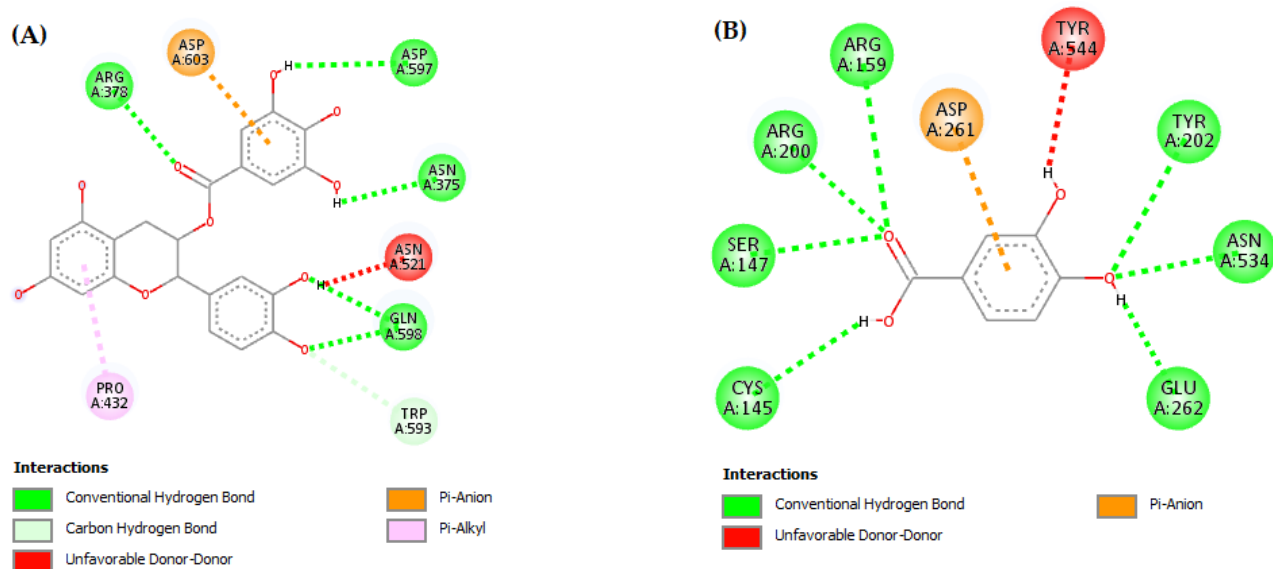

Figure S3. 2D binding interactions of the potent inhibitor from AHEE, Catechin gallate (A), and the native ligand, Protocatechuic acid (B), against Lipoxxygenase protein (PDB ID: 1N8Q)

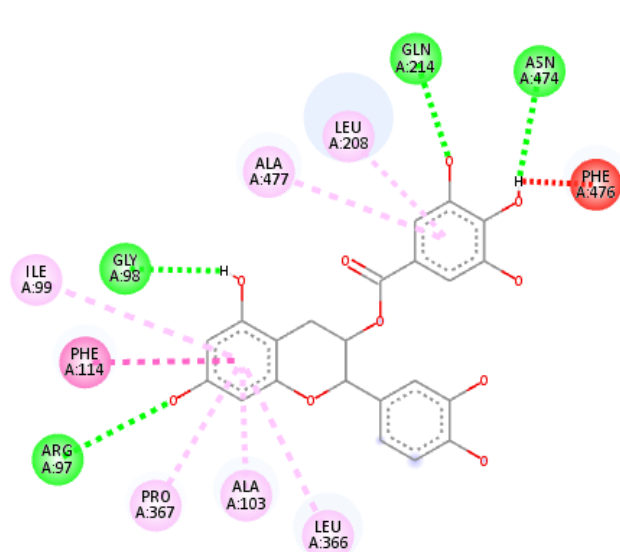

#### Interactions

- Conventional Hydrogen Bond
- Unfavorable Donor-Donor
- Pi-Pi Stacked
- Pi-Alkyl

(A)

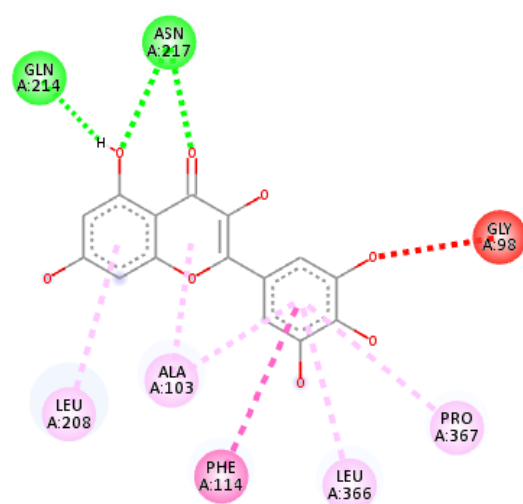

#### Interactions

- Conventional Hydrogen Bond
- Unfavorable Donor-Donor
- Unfavorable Acceptor-Acceptor
- Pi-Pi Stacked
- Pi-Alkyl

(B)

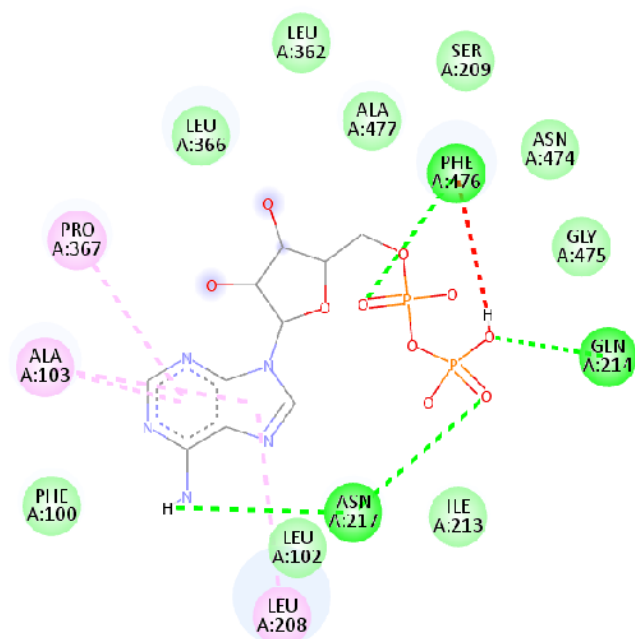

#### Interactions

- van der Waals
- Conventional Hydrogen Bond
- Unfavorable Donor-Donor
- Pi-Alkyl

(C)

**Figure S4.** 2D binding interactions of the potent inhibitors from AHEE, Catechin gallate (A), Mericetin (B), and the native ligand, Warfarin (C), against CYP450 protein (PDB ID: 1OG5)

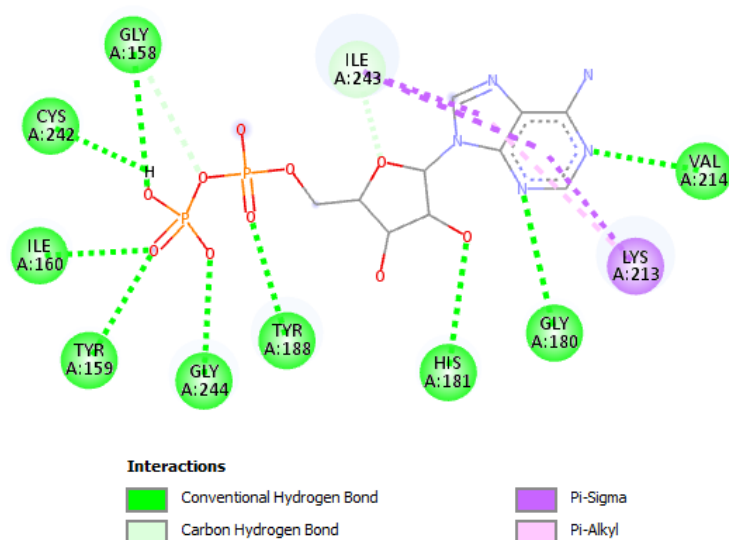

**Figure S5.** 2D binding interactions of Adenosine-5'-diphosphate (native ligand), against NADPH Oxidase protein (PDB ID: 2CDU), \* Our analysis revealed that none of the identified compounds in AHEE can inhibit the activity of NADPH Oxidase.

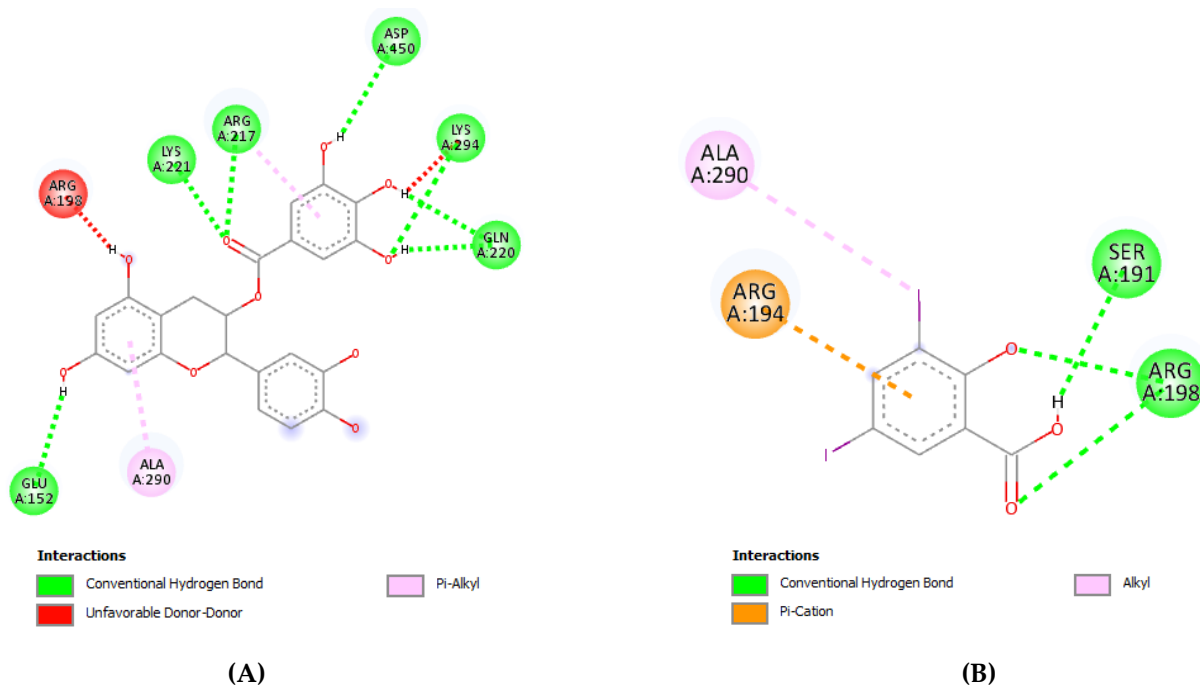

**Figure S6.** 2D binding interactions of the potent inhibitor from AHEE, Catechin gallate (A), 3,5-Diiodosalicylic Acid (native ligand) (B), against Bovine Serum Albumin (BSA) protein (PDB ID: 4JK4), \* All the identified components were found to be potent inhibitors of BSA protein.
